# Supplementary material for: Blood serum and BSA, but neither red blood cells nor hemoglobin can support vitellogenesis and egg production in the dengue vector Aedes aegypti
Source: PeerJ. 2015 May 5;3:e938. doi: 10.7717/peerj.938 (PMC4435475; doi:10.7717/peerj.938)
Supplement: Supplemental Information 1 [file peerj-03-938-s001.xlsx]

## Sheet: Figure 2
5/2/2014 Trial	BSA Sol. (w ATP)	Total mosquitoes	# fully fed	# not fed	Time fed (min)	Weight of fed (g)	Weight of fed/total	Died w/in 2 days	Total mosq. Left	% that Fed
	PBS	32	19	13	32	0.0768	0.00404211	0	19	59.375
	APS	14	4	10	45	0.0179	0.004475	0	4	28.5714
	Na+PBS	13	3	10	50	0.0109	0.00363333	0	3	23.0769
	K+PBS	20	6	14	54	0.0221	0.00368333	2	4	30
5/13/2014 Trial	BSA Sol. (w ATP)	Total mosquitoes	# fully fed	# not fed	Time fed (min)	Weight of fed (g)	Weight of fed/total	Died w/in 2 days	Total mosq. Left	% that Fed
	PBS	40	27	13	60	0.108	0.004	1	26	67.5
	APS	40	11	29	60	0.0455	0.00413636	2	9	27.5
	Na+ PBS	40	18	22	60	0.0673	0.00373889	0	18	45
	K+ PBS	40	7	33	60	0.0263	0.00375714	1	6	17.5
6/13/2014 Trial	BSA Sol. (w ATP)	Total mosquitoes	# fully fed	# not fed	Time fed (min)	Weight of fed (g)	Weight of fed/total	Died w/in 2 days	Total mosq. Left	% that Fed
	PBS	29	5	24	60	0.0154	0.00308	5	0	17.2414
	APS	29	7	22	60	0.0183	0.00261429	0	7	24.1379
	Na+ PBS	29	2	27	60	0.0021	0.00105	1	1	6.89655
	K+ PBS	24	12	12	60	0.0217	0.00180833	0	12	50
5/30/2014 Trial	Hb Sol. (w ATP)	Total mosquitoes	# fully fed	# not fed	Time fed (min)	Weight of fed (g)	Weight of fed/total	Died w/in 2 days	Total mosq. Left	% that Fed
	PBS	40	19	21	60	0.0556	0.00292632	1	18	47.5
	APS	40	18	22	60	0.0525	0.00291667	11	7	45
	Na+ PBS	40	21	19	60	0.0668	0.00318095	4	17	52.5
	K+ PBS	39	21	18	60	0.0628	0.00299048	4	17	53.8462
Fri. 6/6/2014	Hb Sol. (w ATP)	Total mosquitoes	# fully fed	# not fed	Time fed (min)	Weight of fed (g)	Weight of fed/total	Died w/in 2 days	Total mosq. Left	% that Fed
	PBS	28	4	24	60	0.0147	0.003675	0	4	14.2857
	APS	27	3	24	60	0.0085	0.00283333	0	3	11.1111
	Na+ PBS	28	0	28	60	0	0	0	0	0
	K+ PBS	29	4	25	60	0.013	0.00325	0	4	13.7931
Tues. 6/10/2014	Hb Sol. (w ATP)	Total mosquitoes	# fully fed	# not fed	Time fed (min)	Weight of fed (g)	Weight of fed/total	Died w/in 2 days	Total mosq. Left	% that Fed
	PBS	40	1	39	60	0.0013	0.0013	0	1	2.5
	APS	41	6	35	60	0.0198	0.0033	0	6	14.6341
	Na+ PBS	40	1	39	60	0.0037	0.0037	0	1	2.5
	K+ PBS	40	7	33	60	0.0163	0.00232857	0	7	17.5
Mon. 7/21/2014	Solution (w ATP)	Total mosquitoes	# fully fed	# not fed	Time fed (min)	Weight of fed (g)	Weight of fed/total fed	Died w/in 2 days	Total mosq. Left	% that Fed
	Whole Blood	27	19	8	60	0.0688	0.00362105	0	19	70.3704
	Red Blood Cells	26	1	25	60	0.0011	0.0011	0	1	3.84615
	Bovine Serum	28	7	21	60	0.0126	0.0018	0	7	25
Thu. 7/24/2014	Solution (w ATP)	Total mosquitoes	# fully fed	# not fed	Time fed (min)	Weight of fed (g)	Weight of fed/total fed	Died w/in 2 days	Total mosq. Left	% that Fed
	Whole Blood	28	23	5	60	0.0895	0.0038913	0	23	82.1429
	Red Blood Cells	30	16	14	60	0.0645	0.00403125	0	16	53.3333
	Bovine Serum	30	14	16	60	0.0437	0.00312143	0	14	46.6667
Tue. 8/5/2014	Solution (w ATP)	Total mosquitoes	# fully fed	# not fed	Time fed (min)	Weight of fed (g)	Weight of fed/total fed	Died w/in 2 days	Total mosq. Left	% that Fed
	Whole Blood	30	17	13	60	0.0656	0.00385882	0	17	56.6667
	Red Blood Cells	30	2	25	60	0.015	0.0075	0	2	6.66667
	Serum	29	5	27	60	0.0079	0.00158	0	5	17.2414
Tue. 8/5/2014	Solution (w ATP)	Total mosquitoes	# fully fed	# not fed	Time fed (min)	Weight of fed (g)	Weight of fed/total fed	Died w/in 2 days	Total mosq. Left	% that Fed
	Whole Blood	23	13	10	60	0.0462	0.00355385	0	13	56.5217
	Red blood cells	30	4	26	60	0.0169	0.004225	1	3	13.3333
	Serum	29	0	29	60	0	0	0	0	0

## Sheet: Figure 3
Whole Bovine Blood				Bovine Serum Fraction				Bovine Red Blood Cells				Bovine Serum Albumin in PBS				Hemoglobin in PBS
Feeding Trial	Identifier	# Eggs Laid	# Eggs Total	Feeding Trial	Identifier	# Eggs Laid	# Eggs Total	Feeding Trial	Identifier	# Eggs Laid	# Eggs Total	Feeding Trial	Identifier	# Laid	# Eggs Total	Feeding Trial	Identifier	# Laid	# Eggs Total
1	1	93	93	1	1	8	37	1	1	0	0	1	1	0	0	1	1	0	0
1	2	117	118	1	2	20	22	2	1	0	0	1	2	65	75	1	2	0	0
1	3	93	93	1	3	50	73	2	2	0	0	1	3	85	85	1	3	0	0
1	4	76	76	1	4	0	40	2	3	0	0	1	4	65	67	1	4	0	0
1	5	0	82	1	5	35	35	2	4	0	0	1	5	29	85	1	5	0	0
1	6	0	81	1	6	39	39	2	5	0	0	1	6	0	66	1	6	0	0
1	7	91	95	1	7	0	0	2	6	0	0	1	7	84	86	1	7	0	0
1	8	69	71	2	1	73	77	2	7	0	22	1	8	81	86	1	8	0	0
1	9	83	84	2	2	40	40	2	8	0	0	1	9	69	74	1	9	0	0
1	10	28	43	2	3	82	82	2	9	0	0	1	10	73	75	1	10	0	0
1	11	95	99	2	4	86	87	2	10	0	0	1	11	67	67	1	11	0	0
1	12	89	89	2	5	49	54	2	11	0	0	1	12	39	40	1	12	0	0
1	13	66	83	2	6	4	74	2	12	0	0	1	13	29	60	1	13	0	0
1	14	78	79	2	7	35	52	2	13	0	0	1	14	58	67	1	14	0	0
1	15	81	81	2	8	6	84	2	14	0	0	1	15	76	76	1	15	0	0
1	16	62	62	2	9	55	59	2	15	0	0	1	16	21	48	1	16	0	0
1	17	84	84	2	10	72	72	2	16	0	0	1	17	5	69	1	17	0	0
1	18	10	89	2	11	69	84	3	1	0	0	1	18	73	74	1	18	0	0
1	19	93	93	2	12	76	77	3	2	0	0	1	19	79	82	2	1	0	0
2	1	94	94	2	13	56	58	4	1	0	45	2	1	0	100	2	2	0	0
2	2	99	101	2	14	0	0	4	2	0	0	2	2	76	76	2	3	0	0
2	3	109	109	3	1	0	60	4	3	0	0	2	3	90	90	2	4	0	0
2	4	0	8	3	2	68	68	Since all the values feeding trials produced no eggs, all the values were included in Kruskal-Wallis and Fisher's Exact test.				2	4	47	49	3	1	0	0
2	5	69	75	3	3	33	58					2	5	71	71	In this data set, feeding trial 3 only had one sample size, therefore, it was not included in the Kruskal-Wallis analysis or Fisher's Exact test.
2	6	80	80	3	4	51	51					2	6	38	43
2	7	0	75	3	5	29	65					2	7	7	7
2	8	0	0									2	8	80	80
2	9	111	111									2	9	21	21
2	10	0	0									2	10	84	84
2	11	0	68									2	11	0	82
2	12	34	122									2	12	0	0				3
2	13	94	97									2	13	0	72
2	14	106	107									2	14	100	100
2	15	27	108									2	15	0	79
2	16	39	98									2	16	83	83
2	17	94	96									2	17	83	85
2	18	0	85									2	18	113	113
2	19	0	66									2	19	0	104
2	20	8	74									2	20	0	123
2	21	53	63									2	21	71	71
2	22	0	52									2	22	0	0
2	23	98	98									2	23	47	70
3	1	34	68									2	24	0	0
3	2	0	74									2	25	89	90
3	3	80	81									2	26	0	0
3	4	58	58
3	5	0	93
3	6	74	74
3	7	78	78
3	8	0	79
3	9	49	69
3	10	0	3
3	11	8	43
3	12	95	95
3	13	15	78
3	14	67	68
3	15	0	67
3	16	92	92
3	17	0	68
4	1	84	85
4	2	13	63
4	3	0	103
4	4	31	68
4	5	74	76
4	6	16	88
4	7	0	76
4	8	0	36
4	9	0	0
4	10	103	103
4	11	56	56
4	12	73	78
4	13	107	107

## Sheet: Figure 5
Females Fed Bovine Serum Albumin in PBS Fed Females					Females Fed Bovine Serum Albumin in APS					Females Fed Bovine Serum Albumin in NaPBS					Females Fed Bovine Serum Albumin in KPBS
Feeding Trial	Identifier	# Laid	# in Ovaries	Total Eggs	Feeding Trial	Identifier	# Laid	# in Ovaries	Total Eggs	Feeding Trial	BSA NaPBS	# Laid	# in Ovaries	Total Eggs	Feeding Trial	BSA KPBS	# Laid	# in Ovaries	Total Eggs
1	1	0	0	0	1	1	55	9	64	1	1	58	0	58	1	1	60	2	62
1	2	65	10	75	1	2	94	0	94	1	2	31	1	32	1	2	62	0	62
1	3	85	0	85	1	3	74	0	74	1	3	66	4	70	1	3	69	0	69
1	4	65	2	67	1	4	74	1	75	2	1	30	1	31	1	4	75	8	83
1	5	29	56	85	2	1	93	3	96	2	2	28	0	28	1	5	Died	Died
1	6	0	66	66	2	2	66	5	71	2	3	74	4	78	1	6	Died	Died
1	7	84	2	86	2	3	107	2	109	2	4	8	0	8	2	1	103	0	103
1	8	81	5	86	2	4	6	96	102	2	5	69	0	69	2	2	20	31	51
1	9	69	5	74	2	5	63	21	84	2	6	0	69	69	2	3	36	42	78
1	10	73	2	75	2	6	88	2	90	2	7	80	1	81	2	4	54	4	58
1	11	67	0	67	2	7	87	0	87	2	8	0	0	0	2	5	99	2	101
1	12	39	1	40	2	8	33	37	70	2	9	69	1	70	2	6	1	69	70
1	13	29	31	60	2	9	47	21	68	2	10	20	0	20	3	1	14	84	98
1	14	58	9	67	3	1	0	80	80	2	11	98	0	98	3	2	0	0	0
1	15	76	0	76	3	2	0	0	0	2	12	0	0	0	3	3	73	2	75
1	16	21	27	48	3	3	0	53	53	2	13	66	8	74	3	4	0	56	56
1	17	5	64	69	3	4	0	31	31	2	14	19	0	19	3	5	0	39	39
1	18	73	1	74	3	5	0	46	46	2	15	71	16	87	3	6	57	0	57
1	19	79	3	82	3	6	0	58	58	2	16	0	0	0	3	7	0	56	56
2	1	0	100	100	3	7	0	24	24	2	17	0	0	0	3	8	59	0	59
2	2	76	0	76		Mean	44.35	24.45	68.8	2	18	29	0	29	3	9	69	0	69
2	3	90	0	90		Mean w/o feeding 3	68.2308	15.1538	83.3846	3	1	0	65	65	3	10	23	28	51
2	4	47	2	49	In this data set, feeding trial 3 contained all zeroes, therefore, trial 3 values were not included in the Kruskal-Wallis test.						Mean	37.0909	7.72727	44.8182	3	11	75	0	75
2	5	71	0	71							Mean w/o feeding 3	38.8571	5	43.8571	3	12	44	0	44
2	6	38	5	43						In this data set, feeding trial 3 only had one sample size, therefore, trial 3 values were not included in the Kruskal-Wallis test.						Mean	45.1364	19.2273	64.3636
2	7	7	0	7
2	8	80	0	80
2	9	21	0	21
2	10	84	0	84
2	11	0	82	82
2	12	0	0	0
2	13	0	72	72
2	14	100	0	100
2	15	0	79	79
2	16	83	0	83
2	17	83	2	85
2	18	113	0	113
2	19	0	104	104
2	20	0	123	123
2	21	71	0	71
2	22	0	0	0
2	23	47	23	70
2	24	0	0	0
2	25	89	1	90
2	26	0	0	0
	Mean	46.6222	19.4889	66.1111

## Sheet: Figure 6
Egg Viability Raw data
	Hatch date		# Eggs Laid	# Hatched Eggs	# larvae (72h)	# larvae (96h)	# larvae (120h)	Total hatched (at 120h)	Hatch Ratio %
1st replicate	2015-03-03											Hatch Rate %
	Whole Blood		456	456	236	247	247	247	54.1667			WB	Serum	BSA APS	BSA APS+Fe
	Serum		229	229	73	119	126	126	55.0218		1	54.1667	55.0218	7.05128	13.7079
	BSA APS		468	468	22	25	33	33	7.05128		2	66.4773	61.6162	16.9643	75
	BSA APS+Iron		445	445	17	57	61	61	13.7079		3	82.9384	68.642	31.3901	16.8776
											4	88.6076	68.6981	5.21042	26.6667
2nd replicate	2015-03-20
	Whole Blood		352	352	227	234	234	234	66.4773		mean	73.0475	63.4945	15.154	33.063
	Serum		99	99	53	61	61	61	61.6162		SD	13.5978	5.67644	10.3853	24.679
	BSA APS		112	112	14	18	19	19	16.9643		SEM	6.7989	2.83822	5.19265	12.3395
	BSA APS+Iron		8	8	1	5	6	6	75
3rd replicate	2015-03-26
	Whole Blood		422	422	304	314	350	350	82.9384
	Serum		405	405	216	276	278	278	68.642
	BSA APS		223	223	38	64	70	70	31.3901
	BSA APS+Iron		237	237	19	29	40	40	16.8776
4th replicate	2015-03-26
	Whole Blood		79	79	64	70	70	70	88.6076
	Serum		361	361	230	242	248	248	68.6981
	BSA APS		499	499	0	16	26	26	5.21042
	BSA APS+Iron		75	75	15	18	20	20	26.6667

## Sheet: Table 1
	Buffer
	PBS	APS	NaPBS	KPBS
Sodium Chloride (NaCl)	136.9	150	137	2.7
Potassium Chloride (KCl)	2.7	4	2.7	137
Disodium Phosphate (Na2HPO4)	8.1	0	10	2
Sodium Bicarbonate (NaHCO3)	0	0.1	0	0
Magnesium Chloride (MgCl2)	0	0.6	0	0
Potassium Dihydrogen Phosphate (KH2PO4)	1.5	0	2	10
Calcium Chloride (CaCl2)	0	1.7	0	0
HEPES buffer	0	25	0	0
pH	7.4	7	7.5	7.5

## Sheet: Table 2
Bovine Serum Albumin in PBS				Bovine Serum Albumin in APS				Bovine Serum Albumin in NaPBS				Bovine Serum Albumin in KPBS
Feeding Trial	Identifier	# Laid	# in Ovaries	Feeding Trial	Identifier	# Laid	# in Ovaries	Feeding Trial	Identifier	# Laid	# in Ovaries	Feeding Trial	Identifier	# Laid	# in Ovaries
2	1	0	100	2	1	93	3	2	1	30	1	2	1	103	0
2	2	76	0	2	2	66	5	2	2	28	0	2	2	20	31
2	3	90	0	2	3	107	2	2	3	74	4	2	3	36	42
2	4	47	2	2	4	6	96	2	4	8	0	2	4	54	4
2	5	71	0	2	5	63	21	2	5	69	0	2	5	99	2
2	6	38	5	2	6	88	2	2	6	0	69	2	6	1	69
2	7	7	0	2	7	87	0	2	7	80	1
2	8	80	0	2	8	33	37	2	8	0	0
2	9	21	0	2	9	47	21	2	9	69	1
2	10	84	0					2	10	20	0
2	11	0	82					2	11	98	0
2	12	0	0					2	12	0	0
2	13	0	72					2	13	66	8
2	14	100	0					2	14	19	0
2	15	0	79					2	15	71	16
2	16	83	0					2	16	0	0
2	17	83	2					2	17	0	0
2	18	113	0					2	18	29	0
2	19	0	104
2	20	0	123
2	21	71	0
2	22	0	0
2	23	47	23
2	24	0	0
2	25	89	1
2	26	0	0
Hemoglobin in PBS				Hemoglobin in APS				Hemoglobin in NaPBS				Hemoglobin in KPBS
Feeding Trial	Identifier	# Laid	# in Ovaries	Feeding Trial	Identifier	# Laid	# in Ovaries	Feeding Trial	Identifier	# Laid	# in Ovaries	Feeding Trial	Identifier	# Laid	# in Ovaries
1	1	0	0	1	1	0	0	1	1	0	0	1	1	0	0
1	2	0	0	1	2	0	0	1	2	0	0	1	2	0	0
1	3	0	0	1	3	0	0	1	3	0	0	1	3	0	0
1	4	0	0	1	4	0	0	1	4	0	0	1	4	0	0
1	5	0	0	1	5	0	0	1	5	0	17	1	5	0	0
1	6	0	0	1	6	0	0	1	6	0	0	1	6	0	0
1	7	0	0	1	7	0	0	1	7	0	0	1	7	0	0
1	8	0	0					1	8	0	0	1	8	0	0
1	9	0	0					1	9	0	0	1	9	0	0
1	10	0	0					1	10	0	0	1	10	0	0
1	11	0	0					1	11	0	0	1	11	0	0
1	12	0	0					1	12	0	0	1	12	0	0
1	13	0	0					1	13	0	0	1	13	0	0
1	14	0	0					1	14	0	0	1	14	0	0
1	15	0	0					1	15	0	0	1	15	0	0
1	16	0	0					1	16	0	0	1	16	0	0
1	17	0	0					1	17	0	0	1	17	0	0
1	18	0	0
